# Supplementary material for: The role of nitric oxide in tumour progression
Source: Springer Nature journal article supplement (doi:10.1038/nrc1910), 2006-06-23
Supplement: 41568_2006_BFnrc1910_MOESM1_ESM.pdf [file 41568_2006_BFnrc1910_MOESM1_ESM.pdf]

Supplemental Table S1. NOS expression and its relationship with human tumour progression.

| Tumour type   | Detected NOS localization |                            |                        | Relationship between NOS expression and tumour progression |                                                                                                                                                  | References                                                                                                 |                                        |
|---------------|---------------------------|----------------------------|------------------------|------------------------------------------------------------|--------------------------------------------------------------------------------------------------------------------------------------------------|------------------------------------------------------------------------------------------------------------|----------------------------------------|
|               | Tumour cells              | Vascular endothelial cells | Stromal / Immune cells | Detection methods                                          | Positive correlation                                                                                                                             |                                                                                                            | No correlation or negative correlation |
| Brain         | nNOS, eNOS, iNOS          | eNOS, (iNOS)               | iNOS                   | IHC, WB, ISH, NOS activity                                 | nNOS/eNOS with tumour grade<br>vascular eNOS with tumour cell proliferation                                                                      | iNOS inversely with tumour grade                                                                           | 1-6                                    |
| Head and neck | iNOS, eNOS                | eNOS, iNOS                 | iNOS                   | IHC, WB, NB, RT-PCR, ISH, NOS activity                     | iNOS with p53 mutation, PGE <sub>2</sub> , COX-2 and VEGF-C expression, blood and lymph vascular density, tumour stage and lymph node metastasis | iNOS not with size or degree of differentiation<br>eNOS not with degree of differentiation                 | 7-18                                   |
| Thyroid*      | iNOS                      | (iNOS)                     | (iNOS)                 | IHC, ISH                                                   | Nitrotyrosine level with VEGF-D expression, lymph node metastasis                                                                                | iNOS not with size, stage and outcome of tumours<br>less eNOS in tumours<br>total NOS with better survival | 19,20                                  |
| Lung          | eNOS, nNOS, iNOS          | eNOS, iNOS                 | iNOS, eNOS             | IHC, RT-PCR, exhaled NO                                    | iNOS with p53 mutation, VEGF expression and microvascular density                                                                                |                                                                                                            | 21-24                                  |

|                 |                          |                 |                 |                                        |                                                                                                                                                                                                                                                            |                                                                                                                                                                                                                                                                                                      |              |
|-----------------|--------------------------|-----------------|-----------------|----------------------------------------|------------------------------------------------------------------------------------------------------------------------------------------------------------------------------------------------------------------------------------------------------------|------------------------------------------------------------------------------------------------------------------------------------------------------------------------------------------------------------------------------------------------------------------------------------------------------|--------------|
| Breast          | iNOS,<br>eNOS,<br>(nNOS) | eNOS,<br>(nNOS) | iNOS,<br>(nNOS) | IHC, WB,<br>EPR, NOS<br>activity       | iNOS with VEGF expression,<br>microvascular density,<br>invasive tumours, tumour<br>size, grade, nodal and<br>distal metastasis, and poor<br>survival<br><br>Nitrotyrosine level with<br>VEGF-C expression, lymph<br>node metastasis, and poor<br>survival | eNOS/nNOS not with<br>microvascular density or<br>tumour grade<br><br>eNOS negatively with grade<br>and lymph node status<br><br>eNOS/iNOS not with tumour<br>size or degree of<br>differentiation<br><br>iNOS with apoptosis and<br>inversely with tumour cell<br>proliferation and tumour<br>grade | <b>25-36</b> |
| Oesophagus<br>* | iNOS                     |                 |                 | IHC, RT-<br>PCR                        | iNOS in Barrett's<br>oesophagus, dysplasia and<br>carcinomas<br><br>iNOS with Helicobacter<br>pylori infection, VEGF<br>expression, microvascular<br>density, poor<br>differentiation, lymph node<br>metastasis and worse<br>survival                      | iNOS not with tumour size<br>and grade, and VEGF<br>expression<br><br>eNOS with differentiation<br>and negatively with serosal<br>invasion                                                                                                                                                           | <b>37,38</b> |
| Stomach         | iNOS,<br>eNOS            | eNOS            | iNOS            | IHC, WB,<br>RT-PCR,<br>NOS<br>activity | eNOS with microvascular<br>density and poor survival                                                                                                                                                                                                       |                                                                                                                                                                                                                                                                                                      | <b>39-44</b> |
| Colon           | iNOS,<br>(cNOS)          | eNOS            | iNOS            | IHC, WB,<br>RT-PCR,<br>NOS<br>activity | iNOS with p53 mutation,<br>VEGF expression,<br>microvascular density,<br>vascular invasion, and<br>stage                                                                                                                                                   | iNOS not with p53 and APC<br>mutation, lymph node<br>metastasis, microvascular<br>density or tumour size<br><br>iNOS inversely with tumour<br>stage and positively with<br>survival                                                                                                                  | <b>45-54</b> |
| Pancreas        | iNOS                     | eNOS            | (iNOS)          | IHC, WB,                               |                                                                                                                                                                                                                                                            |                                                                                                                                                                                                                                                                                                      | <b>55,56</b> |

|                       |                  |              |                               |                                                                                                            |                                                                                          |              |
|-----------------------|------------------|--------------|-------------------------------|------------------------------------------------------------------------------------------------------------|------------------------------------------------------------------------------------------|--------------|
| Liver*                | iNOS             |              | IHC, RT-PCR                   | iNOS with COX-2 expression                                                                                 | iNOS not with microvascular density, apoptosis or survival                               | <b>57,58</b> |
| Galbladder r*         | iNOS             | (iNOS)       | IHC                           | iNOS with microvascular density, liver and lymph metastasis                                                | iNOS not with tumour size, differentiation or stage                                      | <b>59</b>    |
| Bladder               | iNOS, eNOS       | eNOS, (iNOS) | IHC, WB, RT-PCR, NOS activity | iNOS with recurrence                                                                                       | iNOS not with invasion, grade or stage<br>eNOS not with grade or stage                   | <b>60-65</b> |
| Kidney                | nNOS             |              | IHC, RT-PCR, NOS activity     | iNOS with cell proliferation, invasion, T-classification, metastasis, PSA, Gleason score and poor survival | nNOS expression and activity are higher in normal tissue and decrease with tumour grade  | <b>66,67</b> |
| Prostate              | iNOS             | eNOS, (iNOS) | IHC, RT-PCR                   | iNOS with nodal status, grade, invasion, cell proliferation and Gleason score                              |                                                                                          | <b>68-71</b> |
| Gynaecological cancer | iNOS, nNOS       | eNOS         | IHC, RT-PCR, NOS activity     |                                                                                                            | NOS not with tumour stage                                                                | <b>72-74</b> |
| Kaposi's sarcoma      | (eNOS)           | eNOS         | IHC                           |                                                                                                            |                                                                                          | <b>75</b>    |
| Melanoma              | iNOS, eNOS, nNOS | eNOS, (iNOS) | IHC, WB, NB, NOS activity     | iNOS with tumour progression, Bcl-2 expression and worse survival (in stage III disease)                   | iNOS not with disease-specific survival and inversely with subsequent distant metastasis | <b>76-79</b> |

| Mesothelio<br>ma* | iNOS | iNOS | IHC, RT-<br>PCR | iNOS not with apoptosis or<br>microvascular density | 80,81 |
|-------------------|------|------|-----------------|-----------------------------------------------------|-------|
|-------------------|------|------|-----------------|-----------------------------------------------------|-------|

NOSs in Parenthesis were only occasionally or faintly detected.

\*Data for eNOS and nNOS are not available. Localised in nerve fibres.

Abbreviations: nitric oxide (NO), NO synthase (NOS), constitutive NOS (cNOS), endothelial NOS (eNOS), inducible NOS (iNOS), neuronal NOS (nNOS), IHC, immunohistochemistry (IHC), in situ hybridization (ISH), Northern blot (NB), Western blot (WB), reverse transcription polymerase chain reaction (RT-PCR), spin-trapping electron paramagnetic resonance spectroscopy (EPR), cyclooxygenase-2 (COX-2), hypoxia inducible factor 1 $\alpha$ , (HIF-1 $\alpha$ ), prostaglandin E<sub>2</sub>, (PGE<sub>2</sub>), prostate specific antigen (PSA), vascular endothelial growth factor (VEGF)

1. Cobbs, C.S., Brennan, J.E., Aldape, K.D., Bredt, D.S. & Israel, M.A. Expression of nitric oxide synthase in human central nervous system tumors. *Cancer Res* **55**, 727-30 (1995).
2. Ludwig, H.C. et al. Expression of nitric oxide synthase isozymes (NOS I-III) by immunohistochemistry and DNA in situ hybridization. Correlation with macrophage presence, vascular endothelial growth factor (VEGF) and oedema volumetric data in 220 glioblastomas. *Anticancer Res* **20**, 299-304 (2000).
3. Broholm, H., Braendstrup, O. & Lauritzen, M. Nitric oxide synthase expression of oligodendrogliomas. *Clin Neuropathol* **20**, 233-8 (2001).
4. Broholm, H. et al. Nitric oxide synthase expression and enzymatic activity in human brain tumors. *Clin Neuropathol* **22**, 273-81 (2003).
5. Iwata, S. et al. Endothelial nitric oxide synthase expression in tumor vasculature is correlated with malignancy in human supratentorial astrocytic tumors. *Neurosurgery* **45**, 24-8; discussion 29 (1999).
6. Bakshi, A., Nag, T.C., Wadhwa, S., Mahapatra, A.K. & Sarkar, C. The expression of nitric oxide synthases in human brain tumours and peritumoral areas. *Journal of the Neurological Sciences* **155**, 196 (1998).
7. Brennan, P.A. et al. Correlation between type II nitric oxide synthase and p53 expression in oral squamous cell carcinoma. *Br J Oral Maxillofac Surg* **38**, 627-632 (2000).
8. Brennan, P.A., Palacios-Callender, M., Umar, T., Tant, S. & Langdon, J.D. Expression of type 2 nitric oxide synthase and p21 in oral squamous cell carcinoma. *Int J Oral Maxillofac Surg* **31**, 200-5 (2002).
9. Brennan, P.A., Palacios-Callender, M., Zaki, G.A., Spedding, A.V. & Langdon, J.D. Type II nitric oxide synthase (NOS2) expression correlates with lymph node status in oral squamous cell carcinoma. *J Oral Pathol Med* **30**, 129-34 (2001).
10. Brennan, P.A. et al. Nitric oxide synthase expression is downregulated in basal cell carcinoma of the head and neck. *Br J Oral Maxillofac Surg* **38**, 633-636 (2000).

11. Gallo, O. et al. Correlation between nitric oxide and cyclooxygenase-2 pathways in head and neck squamous cell carcinomas. *Biochem Biophys Res Commun* **299**, 517-24 (2002).
12. Gallo, O., Sardi, I., Masini, M. & Franchi, A. Re: Relationship Between p53 Mutations and Inducible Nitric Oxide Synthase Expression in Human Colorectal Cancer. *J Natl Cancer Inst* **91**, 1509-1510 (1999).
13. Gallo, O. et al. Down-regulation of nitric oxide synthase-2 and cyclooxygenase-2 pathways by p53 in squamous cell carcinoma. *Am J Pathol* **163**, 723-32 (2003).
14. Shang, Z.J. & Li, J.R. Expression of endothelial nitric oxide synthase and vascular endothelial growth factor in oral squamous cell carcinoma: its correlation with angiogenesis and disease progression. *J Oral Pathol Med* **34**, 134-9 (2005).
15. Rosbe, K.W. et al. Immunohistochemical characterization of nitric oxide synthase activity in squamous cell carcinoma of the head and neck. *Otolaryngology - Head & Neck Surgery* **113**, 541-9 (1995).
16. Gallo, O. et al. Role of nitric oxide in angiogenesis and tumor progression in head and neck cancer. *J Natl Cancer Inst* **90**, 584-596 (1998).
17. Franchi, A. et al. Inducible nitric oxide synthase activity correlates with lymphangiogenesis and vascular endothelial growth factor-C expression in head and neck squamous cell carcinoma. *The Journal of Pathology* **208**, 439-445 (2006).
18. Quintero, M., Brennan, P.A., Thomas, G.J. & Moncada, S. Nitric Oxide Is a Factor in the Stabilization of Hypoxia-Inducible Factor-1{alpha} in Cancer: Role of Free Radical Formation. *Cancer Res* **66**, 770-774 (2006).
19. Kitano, H. et al. Expression of inducible nitric oxide synthase in human thyroid papillary carcinomas. *Thyroid* **9**, 113-7 (1999).
20. Nakamura, Y. et al. Nitric oxide in papillary thyroid carcinoma: induction of VEGF-D and correlation with lymph node metastasis. *J Clin Endocrinol Metab* **in press**(2006).
21. Marrogi, A.J. et al. Nitric oxide synthase, cyclooxygenase 2, and vascular endothelial growth factor in the angiogenesis of non-small cell lung carcinoma. *Clin Cancer Res* **6**, 4739-44 (2000).
22. Puhakka, A. et al. High expression of nitric oxide synthases is a favorable prognostic sign in non-small cell lung carcinoma. *APMIS* **111**, 1137-46 (2003).
23. Liu, C.Y. et al. Increased level of exhaled nitric oxide and up-regulation of inducible nitric oxide synthase in patients with primary lung cancer. *Br J Cancer* **78**, 534-41 (1998).
24. Ambis, S. et al. Vascular endothelial growth factor and nitric oxide synthase expression in human lung cancer and the relation to p53. *British Journal of Cancer* **78**, 233-9 (1998).
25. Loibl, S. et al. The role of early expression of inducible nitric oxide synthase in human breast cancer. *Eur J Cancer* **41**, 265-71 (2005).

26. Loibl, S. et al. Expression of endothelial and inducible nitric oxide synthase in benign and malignant lesions of the breast and measurement of nitric oxide using electron paramagnetic resonance spectroscopy. *Cancer* **95**, 1191-8 (2002).
27. Thomsen, L.L. et al. Nitric oxide synthase activity in human breast cancer. *Br J Cancer* **72**, 41-44 (1995).
28. Vakkala, M. et al. Inducible Nitric Oxide Synthase Expression, Apoptosis, and Angiogenesis in in Situ and Invasive Breast Carcinomas. *Clin Cancer Res* **6**, 2408-2416 (2000).
29. Vakkala, M., Paakko, P. & Soini, Y. eNOS expression is associated with the estrogen and progesterone receptor status in invasive breast carcinoma. *Int J Oncol* **17**, 667-71 (2000).
30. Tschugguel, W. et al. Expression of inducible nitric oxide synthase in human breast cancer depends on tumor grade. *Breast Cancer Res Treat* **56**, 145-51 (1999).
31. Duenas-Gonzalez, A. et al. Expression of inducible nitric oxide synthase in breast cancer correlates with metastatic disease. *Modern Pathology* **10**, 645-9 (1997).
32. Reveneau, S. et al. Nitric oxide synthase in human breast cancer is associated with tumor grade, proliferation rate, and expression of progesterone receptors. *Lab Invest* **79**, 1215-25 (1999).
33. De Paepe, B., Verstraeten, V.M., De Potter, C.R. & Bullock, G.R. Increased angiotensin II type-2 receptor density in hyperplasia, DCIS and invasive carcinoma of the breast is paralleled with increased iNOS expression. *Histochem Cell Biol* **117**, 13-9 (2002).
34. Tse, G.M.K. et al. Stromal nitric oxide synthase (NOS) expression correlates with the grade of mammary phyllodes tumour. *J Clin Pathol* **58**, 600-604 (2005).
35. Martin, J.H., Begum, S., Alalami, O., Harrison, A. & Scott, K.W. Endothelial nitric oxide synthase: correlation with histologic grade, lymph node status and estrogen receptor expression in human breast cancer. *Tumour Biol* **21**, 90-7 (2000).
36. Nakamura, Y. et al. Nitric Oxide in Breast Cancer: Induction of Vascular Endothelial Growth Factor-C and Correlation with Metastasis and Poor Prognosis. *Clin Cancer Res* **12**, 1201-1207 (2006).
37. Tanaka, H. et al. Frequent expression of inducible nitric oxide synthase in esophageal squamous cell carcinomas. *Int J Oncol* **14**, 1069-73 (1999).
38. Wilson, K.T., Fu, S., Ramanujam, K.S. & Meltzer, S.J. Increased expression of inducible nitric oxide synthase and cyclooxygenase-2 in Barrett's esophagus and associated adenocarcinomas. *Cancer Res* **58**, 2929-34 (1998).
39. Doi, C. et al. Expression of nitric oxide synthase in gastric cancer. *Cancer Lett* **144**, 161-7 (1999).
40. Koh, E. et al. Differential expression of nitric oxide synthase in human stomach cancer. *Cancer Lett* **146**, 173-80 (1999).

41. Rieder, G., Hofmann, J.A., Hatz, R.A., Stolle, M. & Enders, G.A. Up-regulation of inducible nitric oxide synthase in *Helicobacter pylori*-associated gastritis may represent an increased risk factor to develop gastric carcinoma of the intestinal type. *Int J Med Microbiol* **293**, 403-12 (2003).
42. Song, Z.J., Gong, P. & Wu, Y.E. Relationship between the expression of iNOS, VEGF, tumor angiogenesis and gastric cancer. *World J Gastroenterol* **8**, 591-5 (2002).
43. Song, Z.Y., Wen, S.Q., Peng, J.P., Huang, X. & Qian, K.D. Significance of vascular endothelial growth factor expression and its correlation with inducible nitric oxide synthase in gastric cancer. *World J Gastroenterol* **10**, 1250-5 (2004).
44. Wang, L. et al. Expression of endothelial nitric oxide synthase correlates with the angiogenic phenotype of and predicts poor prognosis in human gastric cancer. *Gastric Cancer* **8**, 18-28 (2005).
45. Ambis, S. et al. Relationship Between p53 Mutations and Inducible Nitric Oxide Synthase Expression in Human Colorectal Cancer. *J Natl Cancer Inst* **91**, 86-88 (1999).
46. Ambis, S. et al. Frequent nitric oxide synthase-2 expression in human colon adenomas: implication for tumor angiogenesis and colon cancer progression. *Cancer Res* **58**, 334-41 (1998).
47. Chhatwal, V.J., Ngoi, S.S., Chan, S.T., Chia, Y.W. & Mochhala, S.M. Aberrant expression of nitric oxide synthase in human polyps, neoplastic colonic mucosa and surrounding peritumoral normal mucosa. *Carcinogenesis* **15**, 2081-2085 (1994).
48. Cianchi, F. et al. Inducible Nitric Oxide Synthase Expression in Human Colorectal Cancer: Correlation with Tumor Angiogenesis. *Am J Pathol* **162**, 793-801 (2003).
49. Fransen, K. et al. Nitric oxide synthase 2 mRNA expression in relation to p53 and adenomatous polyposis coli mutations in primary colorectal adenocarcinomas. *Surgery* **131**, 384-92 (2002).
50. Hao, X.P., Pretlow, T.G., Rao, J.S. & Pretlow, T.P. Inducible Nitric Oxide Synthase (iNOS) Is Expressed Similarly in Multiple Aberrant Crypt Foci and Colorectal Tumors from the Same Patients. *Cancer Res* **61**, 419-422 (2001).
51. Kojima, M. et al. Nitric oxide synthase expression and nitric oxide production in human colon carcinoma tissue. *J Surg Oncol* **70**, 222-9 (1999).
52. Mochhala, S. et al. Nitric oxide synthase activity and expression in human colorectal cancer. *Carcinogenesis* **17**, 1171-4 (1996).
53. Ropponen, K.M. et al. Expression of inducible nitric oxide synthase in colorectal cancer and its association with prognosis. *Scand J Gastroenterol* **35**, 1204-11 (2000).
54. Yagihashi, N. et al. Increased in situ expression of nitric oxide synthase in human colorectal cancer. *Virchows Arch* **436**, 109-14 (2000).
55. Nussler, A.K. et al. Overexpression of endothelium-derived nitric oxide synthase isoform 3 in the vasculature of human pancreatic tumor biopsies. *Langenbecks Arch Surg* **383**, 474-80 (1998).

56. Vickers, S.M., MacMillan-Crow, L.A., Green, M., Ellis, C. & Thompson, J.A. Association of Increased Immunostaining for Inducible Nitric Oxide Synthase and Nitrotyrosine With Fibroblast Growth Factor Transformation in Pancreatic Cancer. *Arch Surg* **134**, 245-251 (1999).
57. Ikeguchi, M., Ueta, T., Yamane, Y., Hirooka, Y. & Kaibara, N. Inducible nitric oxide synthase and survivin messenger RNA expression in hepatocellular carcinoma. *Clin Cancer Res* **8**, 3131-6 (2002).
58. Rahman, M.A. et al. Coexpression of inducible nitric oxide synthase and COX-2 in hepatocellular carcinoma and surrounding liver: possible involvement of COX-2 in the angiogenesis of hepatitis C virus-positive cases. *Clin Cancer Res* **7**, 1325-32 (2001).
59. Niu, X.J. et al. Relationship between inducible nitric oxide synthase expression and angiogenesis in primary gallbladder carcinoma tissue. *World J Gastroenterol* **10**, 725-8 (2004).
60. Sandes, E.O. et al. Expression of inducible nitric oxide synthase in tumoral and non-tumoral epithelia from bladder cancer patients. *Nitric Oxide* **12**, 39-45 (2005).
61. Shochina, M. et al. Nitric oxide synthase immunoreactivity in human bladder carcinoma. *Mol Pathol* **54**, 248-52 (2001).
62. Swana, H.S. et al. Inducible nitric oxide synthase with transitional cell carcinoma of the bladder. *J Urol* **161**, 630-634 (1999).
63. Hayashi, H. et al. Immunohistochemical findings of nitric oxide synthase expression in urothelial transitional cell carcinoma including dysplasia. *Oncology Reports* **8**, 1275-9 (2001).
64. Klottz, T. et al. Immunolocalization of inducible and constitutive nitric oxide synthases in human bladder cancer. *Urology* **54**, 416-9 (1999).
65. Wolf, H., Haeckel, C. & Roessner, A. Inducible nitric oxide synthase expression in human urinary bladder cancer. *Virchows Arch* **437**, 662-6 (2000).
66. Jansson, O.T. et al. Nitric oxide synthase activity in human renal cell carcinoma. *J Urol* **160**, 556-560 (1998).
67. Renaudin, K. et al. Loss of NOS1 expression in high-grade renal cell carcinoma associated with a shift of NO signalling. *Br J Cancer* **90**, 2364-9 (2004).
68. Uotila, P. et al. Increased expression of cyclooxygenase-2 and nitric oxide synthase-2 in human prostate cancer. *Urol Res* **29**, 23-8 (2001).
69. Aaltona, S.H., Lipponen, P.K. & Kosma, V.M. Inducible nitric oxide synthase (iNOS) expression and its prognostic value in prostate cancer. *Anticancer Res* **21**, 3101-6 (2001).
70. Balacci, S. et al. Inducible nitric oxide synthase expression in benign prostatic hyperplasia, low- and high-grade prostatic intraepithelial neoplasia and prostatic carcinoma. *BJU Int* **88**, 100-3 (2001).



71. Klotz, T., Bloch, W., Volberg, C., Engelmann, U. & Addicks, K. Selective expression of inducible nitric oxide synthase in human prostate carcinoma. *Cancer* **82**, 1897-903 (1998).
72. Hamaoka, R. et al. Different expression patterns of nitric oxide synthase isozymes in various gynecological cancers. *J Cancer Res Clin Oncol* **125**, 321-6 (1999).
73. Thomsen, L.L. et al. Nitric oxide synthase activity in human gynecological cancer. *Cancer Res* **54**, 1352-1354 (1994).
74. Klimp, A.H. et al. Expression of cyclooxygenase-2 and inducible nitric oxide synthase in human ovarian tumors and tumor-associated macrophages. *Cancer Res* **61**, 7305-9 (2001).
75. Wenginger, W. et al. Nitric oxide synthases in Kaposi's sarcoma are expressed predominantly by vessels and tissue macrophages. *Laboratory Investigation* **78**, 949-55 (1998).
76. Ekmekecioglu, S. et al. Inducible nitric oxide synthase and nitrotyrosine in human metastatic melanoma tumors correlate with poor survival. *Clin Cancer Res* **6**, 4768-75 (2000).
77. Salvucci, O., Carsana, M., Bersani, I., Tragni, G. & Anichini, A. Antiapoptotic role of endogenous nitric oxide in human melanoma cells. *Cancer Res* **61**, 318-26 (2001).
78. Tschugguel, W. et al. Inducible nitric oxide synthase (iNOS) expression may predict distant metastasis in human melanoma. *Br J Cancer* **79**, 1609-12 (1999).
79. Massi, D. et al. Inducible nitric oxide synthase expression in benign and malignant cutaneous melanocytic lesions. *J Pathol* **194**, 194-200 (2001).
80. Soini, Y. et al. Expression of inducible nitric oxide synthase in healthy pleura and in malignant mesothelioma. *Br J Cancer* **83**, 880-6 (2000).
81. Marrogi, A. et al. Human Mesothelioma Samples Overexpress Both Cyclooxygenase-2 (COX-2) and Inducible Nitric Oxide Synthase (NOS2): In Vitro Antiproliferative Effects of a COX-2 Inhibitor. *Cancer Res* **60**, 3696-3700 (2000).
